## **Loss of PKC $\alpha$ increases arterial medial calcification in a uremic mouse model of chronic kidney disease**

Samantha J Borland, PhD<sup>1\*</sup>, Cecilia Facchi, MSc<sup>1#</sup>, Julia Behnsen, PhD<sup>2#</sup>, Antony Adamson, PhD<sup>3</sup>, Neil E Humphreys, PhD<sup>3,4§</sup>; Philip J Withers, PhD<sup>2</sup>; Michael J Sherratt, PhD<sup>5</sup>, Sheila E Francis, PhD<sup>6</sup>, Keith Brennan, PhD<sup>7</sup>, Nick Ashton, PhD<sup>1\*</sup>, Ann E Canfield, PhD<sup>1\*</sup>,

<sup>1</sup> Division of Cardiovascular Sciences, School of Medical Sciences, Faculty of Biology, Medicine and Health, University of Manchester, Manchester, United Kingdom, M13 9PL;

<sup>2</sup> Henry Royce Institute, Department of Materials, School of Natural Sciences, Faculty of Science and Engineering, University of Manchester, Manchester, United Kingdom, M13 9PL;

<sup>3</sup> Genome Editing Unit, Faculty of Biology, Medicine and Health, University of Manchester, UK;

<sup>4</sup> Epigenetics and Neurobiology Unit, EMBL Rome, Monterotondo, Italy.

<sup>5</sup> Division of Cell Matrix Biology & Regenerative Medicine, School of Biological Sciences, Faculty of Biology, Medicine and Health, University of Manchester, Manchester, United Kingdom, M13 9PL;

<sup>6</sup> Department of Infection, Immunity and Cardiovascular Disease, University of Sheffield, Sheffield, United Kingdom, S10 2RX;

<sup>7</sup> Division of Molecular & Clinical Cancer Studies, School of Medical Sciences, Faculty of Biology, Medicine and Health, University of Manchester, United Kingdom, M13 9PL;

§ Current address

### **\* Corresponding authors**

Dr Samantha Borland. Division of Cardiovascular Sciences, School of Medical Sciences, Faculty of Biology, Medicine and Health, University of Manchester, Michael Smith Building, Dover Street, Manchester, United Kingdom, M13 9PT. [samantha.borland@manchester.ac.uk](mailto:samantha.borland@manchester.ac.uk). Tel (+44) 161 275 5078.

Prof Ann E Canfield: Division of Cardiovascular Sciences, School of Medical Sciences, Faculty of Biology, Medicine and Health, University of Manchester, Michael Smith Building, Dover Street, Manchester, United Kingdom, M13 9PT. [ann.canfield@manchester.ac.uk](mailto:ann.canfield@manchester.ac.uk). Tel (+44) 161 275 5078.

Dr Nick Ashton: Division of Cardiovascular Sciences, School of Medical Sciences, Faculty of Biology, Medicine and Health, University of Manchester, 3<sup>rd</sup> Floor Core Technology Facility, 46 Grafton Street, Manchester, United Kingdom, M13 9NT. [nick.ashton@manchester.ac.uk](mailto:nick.ashton@manchester.ac.uk). Tel (+44) 161 275 5454.

# Authors with equal contributions in this study

## Abstract

Arterial medial calcification is an independent risk factor for mortality in chronic kidney disease. We previously reported that knock-down of PKC $\alpha$  expression increases high phosphate-induced mineral deposition by vascular smooth muscle cells *in vitro*. This new study tests the hypothesis that PKC $\alpha$  regulates uremia-induced medial calcification *in vivo*. Female wild-type and PKC $\alpha$ <sup>-/-</sup> mice underwent a two-stage subtotal nephrectomy and were fed a high phosphate diet for 8 weeks. X-ray micro computed tomography demonstrated that uremia-induced medial calcification was increased in the abdominal aorta and aortic arch of PKC $\alpha$ <sup>-/-</sup> mice compared to wild-types. Blood urea nitrogen was also increased in PKC $\alpha$ <sup>-/-</sup> mice compared to wild-types; there was no correlation between blood urea nitrogen and calcification in PKC $\alpha$ <sup>-/-</sup> mice. Phosphorylated SMAD2 immunostaining was detected in calcified aortic arches from uremic PKC $\alpha$ <sup>-/-</sup> mice; the osteogenic marker Runx2 was also detected in these areas. No phosphorylated SMAD2 staining were detected in calcified arches from uremic wild-types. PKC $\alpha$  knock-down increased TGF- $\beta$ 1-induced SMAD2 phosphorylation in vascular smooth muscle cells *in vitro*, whereas the PKC $\alpha$  activator prostratin decreased SMAD2 phosphorylation. In conclusion, loss of PKC $\alpha$  increases uremia-induced medial calcification. The PKC $\alpha$ /TGF- $\beta$  signaling axis could therefore represent a new therapeutic target for arterial medial calcification in chronic kidney disease.

## Keywords

Arterial medial calcification, Vascular smooth muscle cell, Protein kinase C $\alpha$ , Transforming growth factor- $\beta$ , X-ray micro computed tomography

**Abbreviations:** BUN, blood urea nitrogen; CKD, chronic kidney disease; PKC $\alpha$ , protein kinase C $\alpha$ ;  $\mu$ CT, X-ray micro computed tomography; TGF- $\beta$ , transforming growth factor- $\beta$ ; VSMC, vascular smooth muscle cells.

## Introduction

Chronic kidney disease (CKD) is a major healthcare burden, with cardiovascular disease a leading cause of death among end-stage renal disease patients<sup>1</sup>. Vascular calcification is a hallmark feature of CKD, and calcification levels are positively correlated with increased morbidity and mortality in these patients<sup>2,3</sup>. Vascular calcification is an active, cell-regulated process resulting in the formation of mineralized tissue, bone and/or cartilage within the blood vessel wall<sup>4</sup>, occurring either within the medial layer of the vessel wall or in the intimal layer in association with atherosclerosis. While CKD patients can develop both types of vascular calcification, calcification of the medial layer is more specific to CKD and is the exclusive form of vascular calcification observed in pediatric CKD patients<sup>5</sup>. Vascular calcification reduces arterial (including aortic) elasticity, leading to an increase in pulse wave velocity, development of left ventricular hypertrophy, reduced coronary perfusion, and myocardial infarction and failure<sup>6</sup>. These cardiovascular complications are the main causes of mortality in patients with CKD. Vascular calcification is also associated with a higher mortality risk in CKD patients following kidney transplantation, and may be a predictor of poor graft outcomes<sup>7</sup>. As existing treatments for vascular calcification in CKD patients are limited, there is an urgent need to identify new therapeutic targets for this disease.

Vascular calcification shares many features with bone formation<sup>8-10</sup>. The phenotypic modulation of a subset of vascular smooth muscle cells (VSMCs) has been strongly implicated in this disease process as these cells can differentiate into osteo/chondrogenic-like cells both *in vitro*<sup>11-16</sup> and *in vivo*<sup>17,18</sup> in response to specific stimuli, resulting in the deposition of a mineralized matrix in the vessel wall. Degradation of elastin in the blood vessel wall has also been shown to occur in uremia and CKD<sup>19</sup>, leading to the over-expression of transforming growth factor- $\beta$  (TGF- $\beta$ ) which promotes VSMC osteogenic differentiation and matrix mineralisation<sup>20,21</sup>.

Protein kinase C $\alpha$  (PKC $\alpha$ ) is a serine/threonine protein kinase that is ubiquitously expressed *in vivo*<sup>22</sup>. It was previously proposed that PKC $\alpha$  inhibitors may improve renal function in patients with diabetic nephropathy<sup>23</sup>. However, we recently discovered that biochemical inhibition of PKC $\alpha$  activity using Gö6976, or knocking-down PKC $\alpha$  expression using small interfering RNA (siRNA), increases high phosphate-induced mineral deposition by vascular smooth muscle cells (VSMCs) *in vitro*<sup>20</sup>; suggesting that vascular calcification and its devastating consequences could be increased if renal disease patients are treated with PKC $\alpha$  inhibitors. However, whether loss of PKC $\alpha$  increases calcification in the inherently more complex environment *in vivo* was unknown.

Therefore, this study aimed to determine whether loss of PKC $\alpha$  affects uremia-induced arterial medial calcification *in vivo* using the murine sub-total nephrectomy and high phosphate diet model<sup>24-26</sup>. Using novel X-ray micro computed tomography ( $\mu$ CT) approaches, we demonstrate that uremia-induced arterial medial calcification is increased significantly in PKC $\alpha$ <sup>-/-</sup> mice compared to wild-type controls. Furthermore, both *in vitro* and *in vivo* studies suggest this increase in calcification is mediated by up-regulated TGF- $\beta$ /SMAD2 signaling in PKC $\alpha$  knock-out VSMCs.

## Results

### Generation of PKC $\alpha$ <sup>-/-</sup> mice using CRISPR/Cas9

For studies on uremia-induced arterial medial calcification, it is essential that mice are on a DBA/2 background to facilitate rapid mineralisation before mice enter into end-stage renal disease<sup>25-27</sup>. Mice are typically backcrossed for at least 5 generations onto the DBA/2 strain; however, this approach can be time-consuming due to the poor breeding patterns encountered by this strain. Therefore, we generated PKC $\alpha$ <sup>-/-</sup> mice on the DBA/2 background using CRISPR/Cas9 (Figure 1A). Mice harbouring InDel-containing alleles were identified by size change from wild-type amplicon size (230bp) (Figure 1B). Three mice were taken forward for Sanger sequencing and changes predicted to lead to frameshift mutations in the exon, and thus gene knock-out, were identified (Figure 1C). Mouse founder 1 was bred with wild-type DBA/2 to establish a colony and bred to homozygosity. Knock-out of the PKC $\alpha$  gene was confirmed by immunoblotting (Figure 1D).

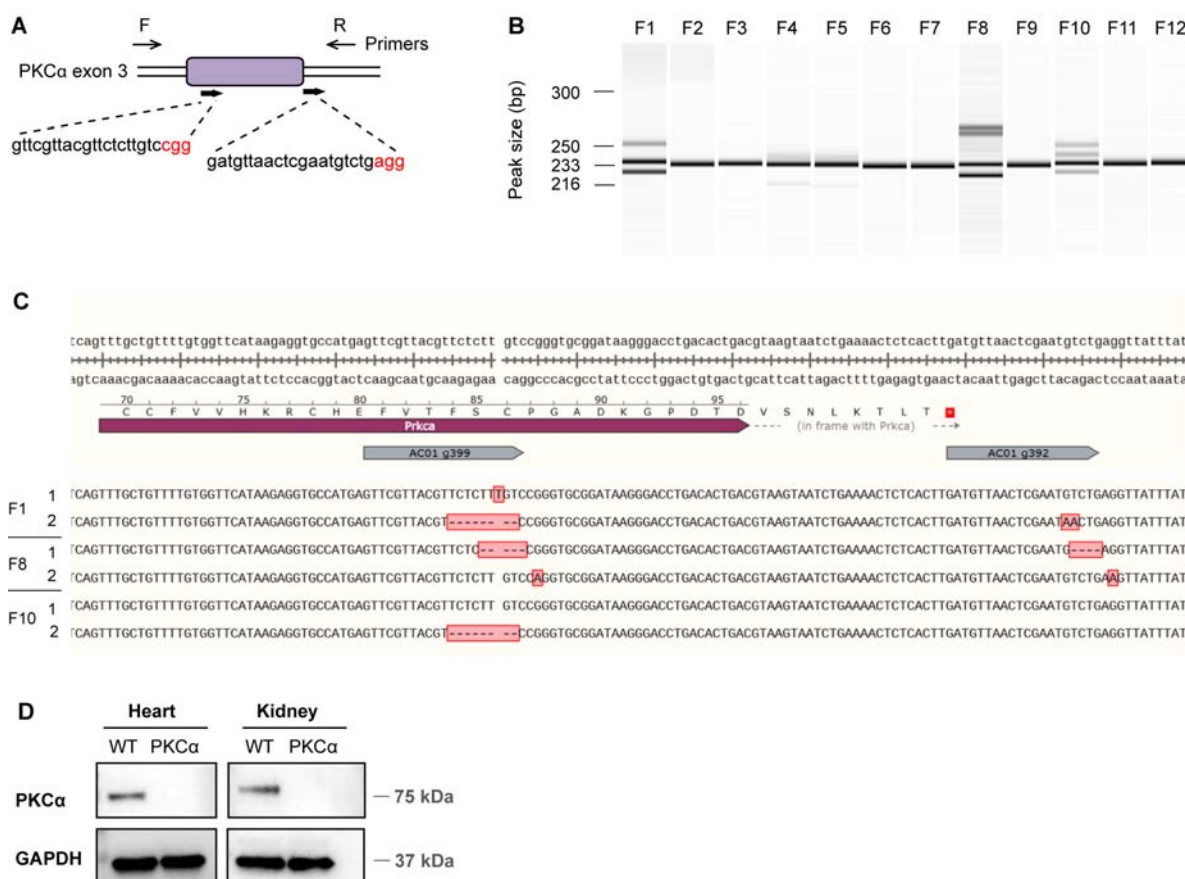

**Figure 1. Generation of PKC $\alpha$ <sup>-/-</sup> mice.** (A) CRISPR targeting design of PKC $\alpha$  exon 3, sgRNA sequences (blue) and PAM sites (red) indicated. (B) PCR genotyping of founders 1-12 (F1-F12). Multi-bands were potential InDel/knock-out alleles. (C) Sequencing of founders 1, 8 and 10. Two different sequences were detected for each pup and are displayed aligned to wild-type (WT) sequence; changes to WT are highlighted in red shaded boxes and summarised in Supplemental Table 1. (D) Heart and kidney tissue lysates from wild-type and PKC $\alpha$ <sup>-/-</sup> mice were immunoblotted for PKC $\alpha$ . GAPDH was used as a loading control.

### PKC $\alpha^{-/-}$ mice exhibit greater uremia following sub-total nephrectomy and high phosphate diet

To determine the role of PKC $\alpha$  in uremia-induced arterial medial calcification, we used the two-stage sub-total nephrectomy and high phosphate diet model<sup>24-26</sup>. Female mice were used as our pilot studies showed that they were more resistant to acute renal failure following the uni-nephrectomy in the second surgical procedure compared with males (results not shown). By the end of the experimental protocol, 77% of female wild-type and 80% of female PKC $\alpha^{-/-}$  mice survived (Figure 2A). There was no significant difference between the survival rates of female wild-type and PKC $\alpha^{-/-}$  mice, suggesting the observed mortality rate is due to consequences of the sub-total nephrectomy itself rather than loss of PKC $\alpha$ . Indeed, 80% of the animal losses occurred within 24 hours of the second surgery, the point at which the risk of acute renal failure is highest. There was no difference in body mass between wild-type and PKC $\alpha^{-/-}$  mice for the duration of the protocol (results not shown).

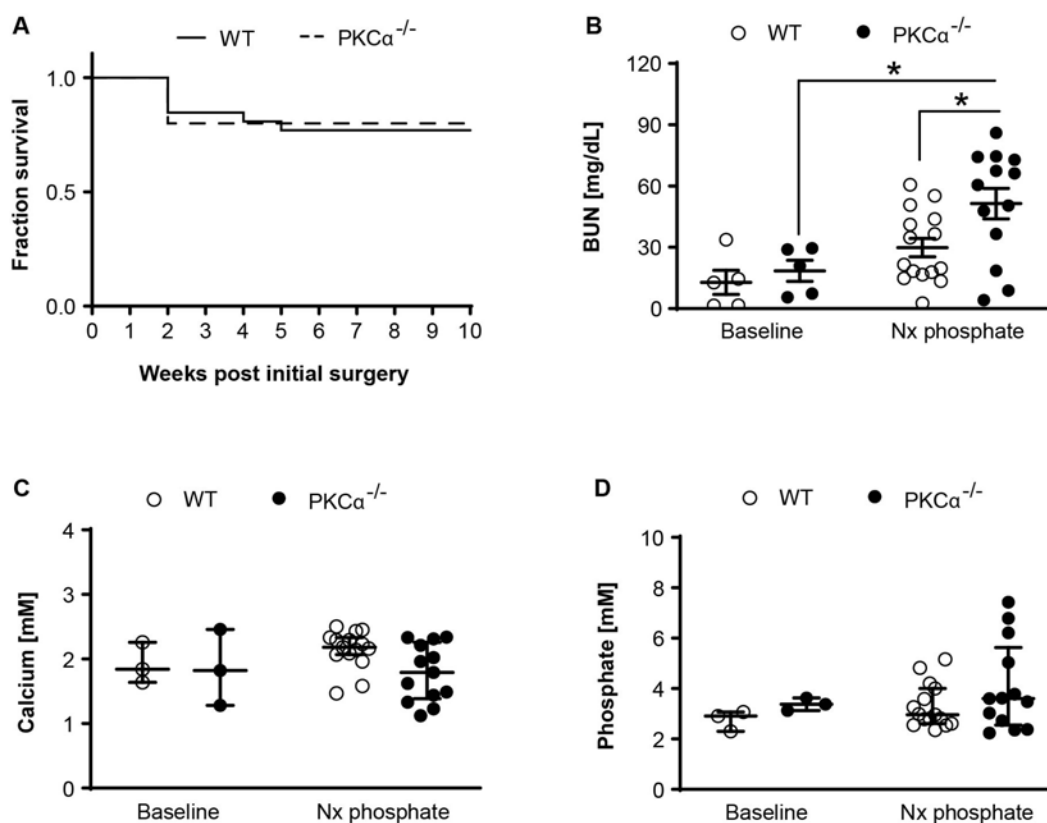

**Figure 2. Survival and serum biochemistry for 5/6 nephrectomy and high phosphate diet fed wild-type and PKC $\alpha^{-/-}$  mice.** (A) Kaplan-Meier survival curve of wild-type (WT) and PKC $\alpha^{-/-}$  mice following 5/6 nephrectomy and high phosphate diet feeding. Gehan-Breslow-Wilcoxon test ( $P=0.9018$ , not significant). Plasma (B) BUN, (C) calcium and (D) phosphate values for WT and PKC $\alpha^{-/-}$  mice at baseline (WT  $n=3-5$ ; PKC $\alpha^{-/-}$   $n=3-5$ ) and the end of study following 5/6 nephrectomy and high phosphate diet feeding (Nx phosphate) (WT  $n=15$ ; PKC $\alpha^{-/-}$   $n=13$ ). (B) Data expressed as mean  $\pm$  SEM and were analyzed using a 2-way ANOVA and Tukey post-hoc comparisons. (C, D) Data expressed as median  $\pm$  interquartile ranges and were analyzed using a Kruskal-Wallis test. \* $P<0.05$ .

Uremia is a surrogate marker of renal function<sup>8</sup>; thus plasma BUN levels were measured at the end of the experimental protocol and compared to age-matched mice at the start of the study. BUN levels were raised in both wild-type and PKC $\alpha$ <sup>-/-</sup> mice when compared to baseline (Figure 2B), confirming induction of uremia; this increase was significant in PKC $\alpha$ <sup>-/-</sup> mice (2.4-fold increase, P<0.05; Figure 2B). By the end of the experimental protocol, BUN levels were increased significantly in PKC $\alpha$ <sup>-/-</sup> mice when compared to wild-type controls (1.5-fold increase, P<0.05; Figure 2B). There was no correlation between BUN levels and the degree of renal mass reduction in either genotype (results not shown).

Following sub-total nephrectomy and high phosphate diet feeding for 8 weeks, there was no significant change in plasma calcium (Figure 2C) and phosphate (Figure 2D) levels in either wild-type or PKC $\alpha$ <sup>-/-</sup> mice when compared to baseline. Calcium (Figure 2C) and phosphate (Figure 2D) levels were also similar between wild-type and PKC $\alpha$ <sup>-/-</sup> mice at the end of the experimental protocol.

### **Arterial medial calcification is increased in PKC $\alpha$ <sup>-/-</sup> mice**

Compared with conventional histological approaches,  $\mu$ CT can visualise and quantify calcification throughout a whole blood vessel in 3-D without the potential for artefacts caused by mechanical sectioning<sup>28, 29</sup>. Therefore,  $\mu$ CT was utilised in this study to quantify calcification in the aortic arch and abdominal aorta of uremic wild-type and PKC $\alpha$ <sup>-/-</sup> mice.

All blood vessels were fixed, dehydrated and paraffin-embedded for  $\mu$ CT scanning<sup>29,30</sup>. In both genotypes, the aortic arch exhibited more calcification than the abdominal aorta (Figure 3A-E). Calcification was generally localized to the arterial branches of the abdominal aorta (Figure 3A) or the ascending aorta region of the aortic arch (Figure 3B). The calcifications were either located alongside the elastic fibers (Figure 4A) or across the width of the arterial wall (Figure 4B).

Loss of PKC $\alpha$  increased uremia-induced arterial medial calcification in the abdominal aorta (4.5-fold, P<0.05; Figure 3A&C) and aortic arch (10-fold, P<0.05; Figure 3B&C) when compared to wild-type controls. The scanned blood vessels were subsequently sectioned and stained with von Kossa to confirm calcification; there was a strong correlation (r=0.888; P=0.0003) between the calcification quantified by  $\mu$ CT and von Kossa (Figure S1A). Good agreement between the calcification quantified by the  $\mu$ CT and von Kossa methods was also confirmed using Bland-Altman analysis (Figure S1B). Comparing the frequency distributions of individual calcification sizes (i.e. individual volumes) from each animal, there was no difference in individual calcification size in the abdominal aorta between wild-type and PKC $\alpha$ <sup>-/-</sup> mice (Figure 3D). However, there was a clear shift towards increased calcification size in the aortic arch of PKC $\alpha$ <sup>-/-</sup> mice when compared to wild-types (Figure 3E). As there was no correlation between BUN levels and the total volume of calcification in either the abdominal aorta (Figure S2A: r=0.42; P=0.155) or aortic arch (Figure S2B: r=0.26; P=0.384) of PKC $\alpha$ <sup>-/-</sup> mice, loss of PKC $\alpha$  appears to increase uremia-induced arterial medial calcification independent of its effects on renal function in these mice.

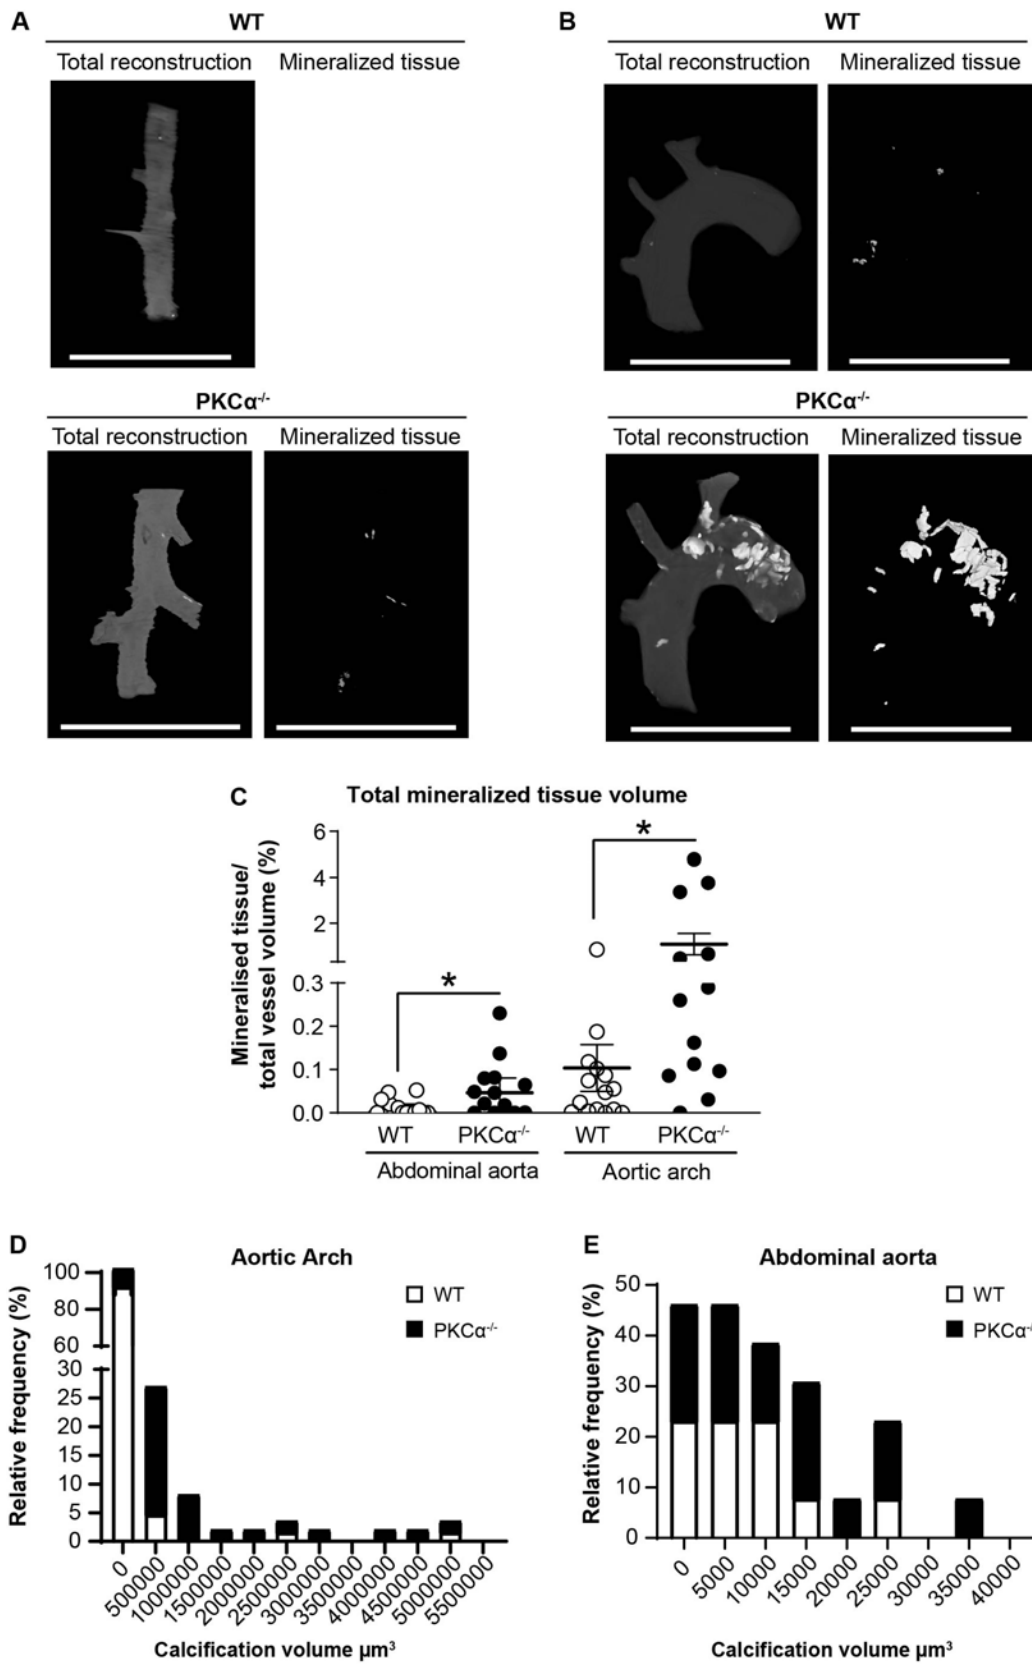

**Figure 3. Arterial medial calcification is increased in 5/6 nephrectomy and high phosphate diet fed PKCa<sup>-/-</sup> mice.** Whole vessel and mineralized tissue 3-D reconstructions of representative wild-type (WT) and



*PKCa*<sup>-/-</sup> (A) abdominal aortas and (B) aortic arches following 5/6 nephrectomy and high phosphate diet feeding. Blood vessels were analyzed by  $\mu$ CT using a 4x objective with a voxel size between 3.4  $\mu$ m and 3.8  $\mu$ m. Scale bar=1500  $\mu$ m. (C) Total mineralized tissue volume expressed as a percentage of total vessel volume (WT n=15; *PKCa*<sup>-/-</sup> n=13). Data expressed as median  $\pm$  interquartile ranges and were analyzed using a Mann Whitney t-test. \**P*<0.05. (D, E) Frequency distribution of individual calcification volumes in the (D) abdominal aorta and (E) aortic arch from 5/6 nephrectomy and high phosphate diet fed WT and *PKCa*<sup>-/-</sup> mice.

Plasma phosphate concentrations and arterial medial calcification was also compared in 5/6 nephrectomy and high phosphate-fed wild-type and *PKCa*<sup>-/-</sup> mice. At a given plasma phosphate concentration, *PKCa*<sup>-/-</sup> mice tended to have more calcification in the aortic arch (Figure S3A) and abdominal aorta (Figure S3B) when compared to wild-type controls. There was a trend for plasma phosphate concentration and aortic arch calcification to be correlated in *PKCa*<sup>-/-</sup> mice, although this did not reach statistical significance in this study (*r*=0.539; *P*=0.06).

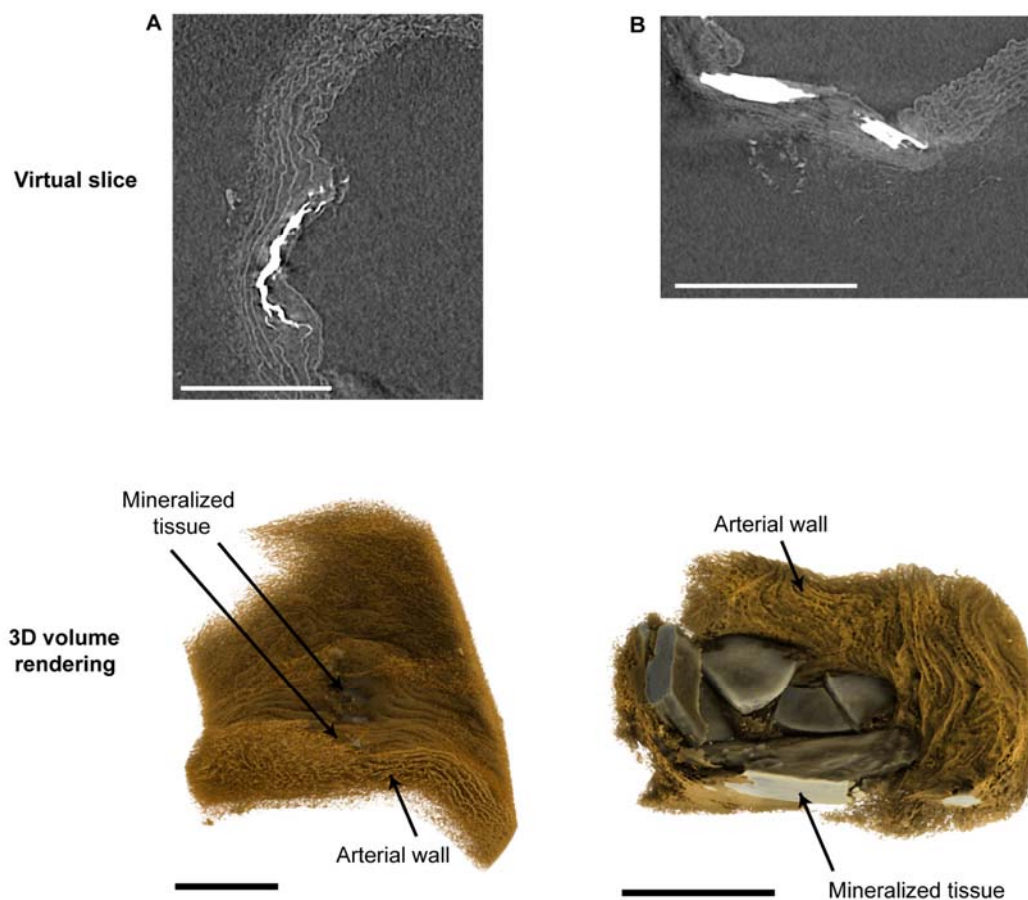

**Figure 4. Localisation of arterial medial calcification in mouse blood vessels.** Micro-CT phase virtual slices and 3-D reconstructions of aortic arches from 5/6 nephrectomy and high phosphate diet fed *PKCa*<sup>-/-</sup> mice using a 20x objective with a voxel size between 0.66  $\mu$ m and 0.7  $\mu$ m. Mineralized tissue localizes (A)



alongside the elastic fibers within the arterial wall, or (B) across the whole width of the arterial wall. All scale bars=200  $\mu$ m.

### PKC $\alpha$ regulates TGF- $\beta$ /SMAD2 signaling *in vitro*

We have shown previously that inhibiting TGF- $\beta$  signaling with SB431542 prevents the increased mineralization observed in PKC $\alpha$ -siRNA treated VSMCs<sup>20</sup>. Therefore, to determine the mechanism by which loss of PKC $\alpha$  increases uremia-induced arterial medial calcification, we further examined the relationship between loss of PKC $\alpha$  and TGF- $\beta$  signaling *in vitro* and *in vivo*.

Knock-down of PKC $\alpha$  in VSMCs using siRNA<sup>20</sup> increased TGF- $\beta$ 1-induced SMAD2 phosphorylation when compared to control siRNA-treated cells ( $P < 0.05$ ; Figure 5A). In contrast, pharmacological activation of PKC $\alpha$  using prostratin (10  $\mu$ M) decreased TGF- $\beta$ 1-induced SMAD2 phosphorylation in VSMCs *in vitro* ( $P < 0.05$ ; Figure 5B). Confirmation that prostratin activated PKC $\alpha$  in these cells was confirmed by immunoblotting for phosphorylated MARK2, a downstream target of PKC $\alpha$  (Figure 5B).

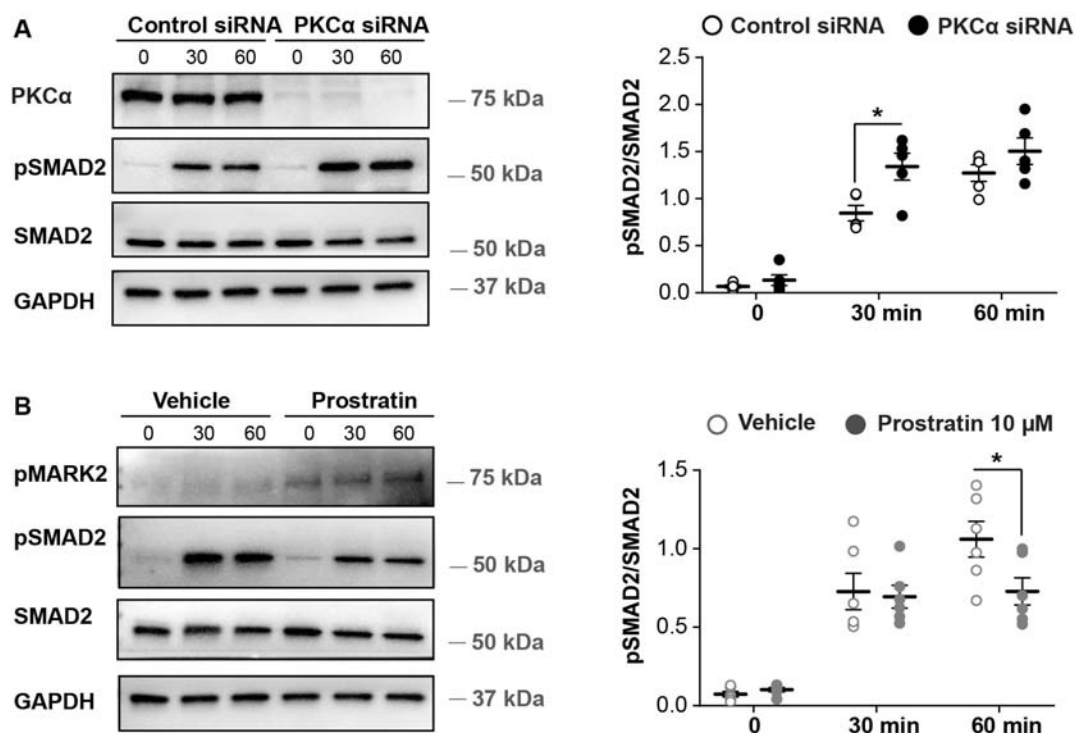

**Figure 5. PKC $\alpha$  modulates TGF- $\beta$ /pSMAD2 signaling in VSMC.** (A) Control and PKC $\alpha$  siRNA-treated VSMCs were serum-starved for 2 h (0) and stimulated with 0.5 ng/ml TGF- $\beta$ 1 for 30 or 60 min. Knock-down was confirmed by immunoblotting for PKC $\alpha$ . (B) VSMCs were serum-starved for 2.5 h (‘0’) with vehicle or prostratin (10  $\mu$ M) and stimulated with 0.5 ng/mL TGF- $\beta$ 1 for 30 or 60 min. Activation of PKC $\alpha$  signaling with prostratin was confirmed by immunoblotting for phosphorylated MARK2 (pMARK2). (A, B) Cell lysates were immunoblotted for phosphorylated SMAD2 (pSMAD2) and total SMAD2; GAPDH was the loading control. Molecular weight markers and the pSMAD2/SMAD2 ratio are shown ( $n = 5-6$  independent

experiments). Data expressed as mean  $\pm$  SEM and were analyzed using a 2-way ANOVA with Sidak post-hoc tests. \* $P < 0.05$ .

### Phosphorylated SMAD2 and Runx2 are detected in calcified aortic arches from PKC $\alpha$ <sup>-/-</sup> mice

To determine whether pro-calcific TGF- $\beta$ /SMAD2 signaling is also increased in calcified aortic arches from PKC $\alpha$ <sup>-/-</sup> mice, immunohistochemistry was performed. Phosphorylated SMAD2 immunostaining was detected at sites of calcification in aortic arches from PKC $\alpha$ <sup>-/-</sup> mice (Figure 6). In contrast, phosphorylated SMAD2 immunostaining was not detected in calcified wild-type arches (Figure 6).

The osteogenic reprogramming of VSMCs, which is preceded by *de novo* expression of Runx2<sup>17,18</sup>, is critical to the development of vascular calcification in both atherosclerosis and CKD<sup>31,32</sup>. Whilst the osteogenic marker, Runx2, was detected in aortic arches from both WT and PKC $\alpha$ <sup>-/-</sup> mice, Runx2 staining was more intense and also localized to areas of phosphorylated SMAD2 immunostaining and von Kossa staining in calcified aortic arches from PKC $\alpha$ <sup>-/-</sup> mice (Figure 6). Together, these studies suggest that loss of PKC $\alpha$  is associated with increased pro-calcific TGF- $\beta$ /SMAD2 signaling and osteogenic marker expression in calcified aortas.

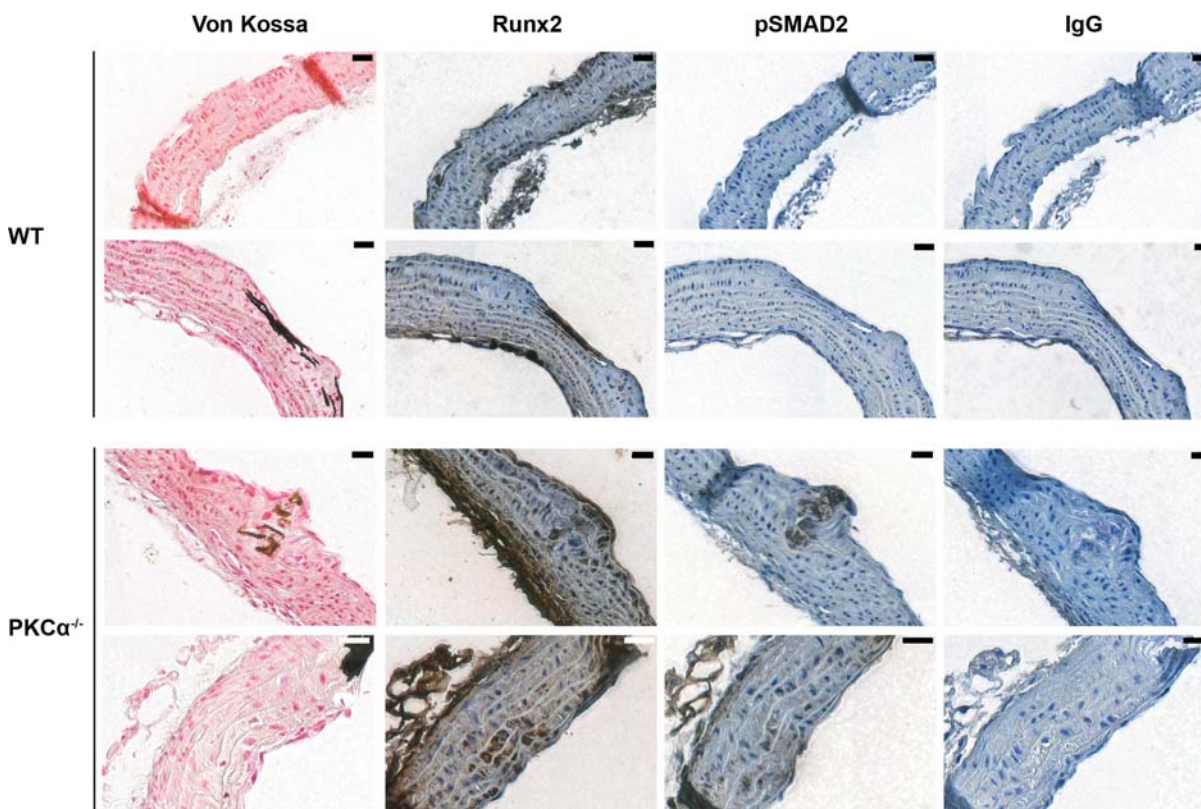

**Figure 6. Phosphorylated SMAD2 is detected in calcified aortic arches from 5/6 nephrectomy and high phosphate diet fed PKC $\alpha$ <sup>-/-</sup> mice.** Immunohistochemistry for phosphorylated SMAD2 (pSMAD2) and Runx2 in representative aortic arches from 5/6 nephrectomy and high phosphate diet fed wild-type (WT) and PKC $\alpha$ <sup>-/-</sup> mice; images from 2 different animals per genotype are shown. Positive antibody staining is shown in

*brown. Von Kossa staining of adjacent sections and IgG controls are shown. No staining was observed in the IgG controls. Scale bar=20  $\mu$ m.*

## Discussion

This is the first demonstration that loss of PKC $\alpha$  increases uremia-induced arterial medial calcification *in vivo*, most likely via a TGF- $\beta$ /SMAD2 mechanism. We show that TGF- $\beta$ 1-induced SMAD2 phosphorylation is increased in PKC $\alpha$  siRNA-treated VSMCs and that extensive phosphorylated SMAD2 expression is detected in calcified aortic arches from PKC $\alpha$ <sup>-/-</sup> mice. As we have previously shown that inhibiting TGF- $\beta$  receptor signaling with SB431542 prevents the increase in mineralization observed in PKC $\alpha$  siRNA-treated VSMCs *in vitro*<sup>20</sup>, these data suggest that loss of PKC $\alpha$  increases calcification both *in vitro*<sup>20,33</sup> and *in vivo* by up-regulating TGF- $\beta$ /SMAD2 signaling in VSMCs.

Consistent with our data, previous studies have shown that TGF- $\beta$ 1-induced Smad2 phosphorylation is increased in PKC $\alpha$ <sup>-/-</sup> podocytes compared to PKC $\alpha$ <sup>+/+</sup> controls<sup>34</sup>. It has been speculated that PKC $\alpha$  is a key mediator of receptor and membrane endocytosis as there is less internalization of the TGF- $\beta$  type-1-receptor in PKC $\alpha$ <sup>-/-</sup> podocytes<sup>34</sup>. It is possible, therefore, that PKC $\alpha$ /TGF- $\beta$  cross-talk in VSMCs may also be mediated by internalization of TGF- $\beta$  type-1-receptor.

Whilst our results strongly suggest an important role for TGF- $\beta$ /SMAD2 signaling in mediating the effects of PKC $\alpha$  in vascular calcification, other signaling pathways may also be involved. For example, WNT/ $\beta$ -catenin signaling promotes vascular calcification<sup>35</sup> and activation of this signaling pathway is enhanced in the bones of PKC $\alpha$ <sup>-/-</sup> mice<sup>36</sup>. TGF- $\beta$ 1 also activates the WNT/ $\beta$ -catenin pathway, which in turn stabilizes the TGF- $\beta$ /SMAD response<sup>37,38</sup>. Loss of PKC $\alpha$  may, therefore, lead to increased pro-calcific TGF- $\beta$ 1/SMAD2 signaling in VSMCs, activating WNT/ $\beta$ -catenin signaling and further promoting vascular calcification. Future studies could determine whether WNT/ $\beta$ -catenin regulates PKC $\alpha$  and TGF- $\beta$  cross-talk during vascular calcification.

Vascular calcification is thought to be preceded by, or to occur simultaneously, with the osteogenic differentiation of VSMCs<sup>26</sup>. Previous studies have shown that TGF- $\beta$  induces the expression of Runx2 in a mouse pluripotent mesenchymal precursor cell line<sup>39,40</sup>, and we show that Runx2 localizes to areas of phosphorylated SMAD2 expression in calcified aortic arches from PKC $\alpha$ <sup>-/-</sup> mice. In contrast, phosphorylated Smad2 was not detected with Runx2 expression in either non-calcified and calcified aortic arches from wild-type mice, suggesting that TGF- $\beta$ /SMAD2 signaling is not driving vascular calcification in wild-type animals and that a 'second hit' is required. Indeed, Runx2 expression is regulated by various mechanisms in VSMCs, including WNT/ $\beta$ -catenin signaling and micro RNAs<sup>41,42</sup>.

Hyperphosphatemia and hypercalcemia are associated with vascular calcification in CKD<sup>8</sup>. Interestingly, calcification occurred in both wild-type and PKC $\alpha$ <sup>-/-</sup> mice despite the apparent 'normal' phosphorus and calcium levels detected after 8 weeks on the high phosphate diet. However, previous studies have shown a rise in calcium and phosphate levels at weeks 1-5 following the initiation of high phosphate diet feeding in mice which have undergone a sub-total nephrectomy, which then normalize by week 7-8<sup>26</sup>.

The pattern and localization of calcification detected in this study are consistent with that observed in previous studies using this uremic DBA/2 mouse model of arterial medial calcification<sup>26, 43-45</sup>; that is,

calcification was focally distributed and 'patchy'. In human specimens where larger calcified deposits have been observed, 'patchy' or focally distributed calcifications have also been detected<sup>5, 46-48</sup>. Therefore, the similar patterns of calcification observed in both mouse models and humans validates the translational validity to the human condition of advanced CKD.

Huesa et al.<sup>28</sup> first reported that  $\mu$ CT imaging could be utilized to visualize and quantify arterial medial calcification in formalin-fixed mouse aortae. Consistent with our study, Huesa et al.<sup>28</sup> reported that calcification was observed within the ascending aorta region of the aortic arch. However, a limitation of their study was that blood vessels were immersed in corn oil for scanning, precluding subsequent histological analysis of the samples. We modified this protocol based on Walton et al.<sup>30</sup> and López-Guimet et al.<sup>29</sup> by embedding mouse blood vessels in paraffin wax, and show that the complete 3-D reconstruction and the accurate quantification of arterial medial calcification by  $\mu$ CT can be combined with subsequent 2-D histological and immunohistochemistry analysis to obtain complementary information about calcification volume, calcification load and signaling mechanisms within the same arterial segment. Furthermore, the high resolution  $\mu$ CT ( $\sim 0.7 \mu\text{m}$ ) capabilities achieved in this study have enabled the visualization of calcified deposits throughout the blood vessel wall extracellular matrix at a micrometer-scale resolution. This protocol offers several advantages over the *o*-Cresolphthalein assay and histology. Firstly, the *o*-Cresolphthalein assay only quantifies calcium content, and does not visualize the localization or distribution of calcification throughout the blood vessel. Secondly, histological analysis is highly dependent upon *which* sections are stained as calcification is focally localized, and calcification can frequently 'drop out' of the tissue when sectioned which precludes the accurate quantification of calcification. The information obtained from a single animal is thus maximized using  $\mu$ CT, which could lead to reductions in the number of animals used in such studies.

Previous studies have shown that PKC $\alpha$  gene expression is *reduced* in kidneys from patients with diabetic nephropathy when compared to non-diabetic controls<sup>50</sup> and loss of PKC $\alpha$  reduces renal dysfunction in a mouse model of diabetic nephropathy<sup>23</sup>. Whilst these studies have indicated that PKC $\alpha$  inhibitors could be of therapeutic benefit in renal disease patients<sup>23</sup>, our demonstration that loss of PKC $\alpha$  is associated with increased BUN levels and arterial medial calcification in the 5/6 nephrectomy mouse model suggests that vascular calcification and its devastating consequences could be increased if renal disease patients are treated with PKC $\alpha$  inhibitors.

In conclusion, we demonstrate herein that loss of PKC $\alpha$  increases uremia-induced arterial medial calcification by enhancing TGF- $\beta$ /SMAD2 signaling. Furthermore, pro-calcific TGF- $\beta$ 1-induced SMAD2 phosphorylation is reduced in VSMCs treated with a pharmacological PKC $\alpha$  activator. Further studies are now required to determine whether increasing PKC $\alpha$  activity will prevent or reduce uremia-induced arterial medial calcification in CKD; thus offering a novel therapeutic approach for this devastating pathology.

## Methods

Detailed methods are provided in the Supplementary material.

## Reagents

Reagents were analytical grade and obtained from Sigma-Aldrich (UK) unless otherwise stated. Recombinant human TGF- $\beta$ 1 (#240-B) was from R&D Systems (UK) and used at a final concentration of 0.5 ng/ml. Prostratin (#P0077) was from Sigma-Aldrich (UK) and used at a final concentration of 10  $\mu$ M; an equivalent volume of vehicle (DMSO) was the control. Immunoblotting antibodies were: phosphorylated SMAD2 (#3108), SMAD2 (#5339) and PKC $\alpha$  (#2056) from Cell Signaling Technology (USA), phosphorylated MARK2 (#34751) from Abcam (UK), GAPDH (60004-1g) and PKC $\alpha$  (21991-1-AP) from Proteintech (UK). Immunohistochemistry antibodies were: phosphorylated SMAD2 (#44-244G) from Thermo Fisher Scientific (UK) and Runx2 (#MAB2006) from R&D Systems (UK).

## Ethical approval

Experiments involving animals were performed in accordance with the UK Animals (Scientific Procedures) Act 1986 (project license number P217A25EF) and received local approval from the University of Manchester Animal Welfare and Ethical Review Board. All efforts were made to minimize suffering throughout the duration of the study. Decisions to cull animals before the end of the study were based on humane end points defined in the project licence.

## Subtotal nephrectomy and high phosphate diet

PKC $\alpha$ <sup>-/-</sup> mice were generated on the calcification-prone DBA/2 background using CRISPR/Cas9 (Table S1). Wild-type DBA/2 mice were used as controls. Animals had access to a standard chow diet (RM1; Special Diet Services, UK) and water *ad libitum* at all times, and were held in a 12 h–12 h light–dark cycle.

Eleven to twelve week-old female wild-type DBA/2 and PKC $\alpha$ <sup>-/-</sup> DBA/2 mice underwent a 5/6 nephrectomy in a two-stage procedure to induce uremia and were fed a standard chow diet (RM1) with 1.5% phosphate (Special Diet Services, UK) for 8 weeks<sup>23</sup>. At the end of the study, mice were euthanized with CO<sub>2</sub>. Following excision of the lungs, blood was allowed to pool in the thoracic cavity from which it was collected prior to perfusion of tissues with 10% (v/v) neutral buffered formalin by intraventricular (left ventricle) injection. The aortic arch and abdominal aortae were dissected, removing fat and connective tissue. Tissues were fixed overnight in 10% (v/v) neutral buffered formalin at 4°C.

## Plasma analysis

Blood urea nitrogen (BUN) levels were determined using a colorimetric detection kit (K024-H1; Arbor Assays, USA). Plasma phosphate and calcium concentrations were analyzed on a Roche Cobas 8000 analyzer system using a c702 module.

## Micro-computed tomography ( $\mu$ CT) scans & analysis

Aortic arches and abdominal aortas were dehydrated and paraffin wax-embedded using a Microm STP 120 processor and Microm EC 350-1/2 embedder. Excess wax around the blood vessels was trimmed using a



straight-edged blade, and a 25G needle was inserted into the wax so that the vessel axis could be mounted perpendicular to the X-ray source.

All blood vessels were imaged in the Henry Moseley X-ray Imaging Facility (University of Manchester, UK) within the Henry Royce Institute using a Carl Zeiss Versa XRM-520 system (Carl Zeiss: USA) with the X-ray source voltage and power set to 80 kV and 7W, respectively. A low resolution data collection scan of the complete artery cross-section was performed using the 4x objective; for some samples, a second higher resolution region-of-interest scan was performed at a 20x objective. Detector and source distances, exposure times, voxel sizes and scan times are provided in the Online Supplement. The 3D data sets were reconstructed from the original projection data using Zeiss' Scout-and-Scan™ Reconstructor and scan data were analysed using Avizo 9.7.0 software as described in the Online Supplement.

### **Histology**

Following  $\mu$ CT scanning, aortic arches were re-embedded in paraffin wax for sectioning. Six-micron sections were cut using a Microm HM 355S and dried overnight at 37°C. Tissue sections, every 60 microns, were analyzed for calcification by staining with von Kossa and counterstaining with nuclear fast red<sup>20</sup>. Images were acquired on a 3D-Histech Panoramic-250 microscope slide-scanner using a 40x/0.95 *Plan Apochromat* objective (Zeiss). Snapshots of the slide-scans were taken using the Case Viewer software (3D-Histech). ImageJ (version 1.52a) was used to quantify calcification as a percentage of the tissue area.

### **Immunohistochemistry**

Aortic arches from wild-type and PKC $\alpha$ <sup>-/-</sup> mice were used for the detection of Runx2 and phosphorylated SMAD2 by immunohistochemistry. Images were acquired on a 3D-Histech Panoramic-250 microscope slide-scanner as described elsewhere<sup>20</sup>.

### **Small interfering-RNA (siRNA)**

VSMCs were transfected with siRNA against PKC $\alpha$  (SI01965138, Qiagen, UK) using RNAiMAX (Invitrogen™, Life Technologies, UK). A random control siRNA (#1027281; Qiagen, UK) was used as the control. VSMCs were cultured for 7 days with repeated siRNA transfections every 48–72 h<sup>20</sup>. We previously reported that this PKC $\alpha$  siRNA achieves a 94% and 92% knock-down efficiency in VSMCs at the mRNA and protein level, respectively<sup>20</sup>.

### **Immunoblotting**

VSMC lysates were analyzed for PKC $\alpha$  (Proteintech 21991-1-AP), phosphorylated MARK2, phosphorylated SMAD2 and total SMAD2 by immunoblotting as described previously (Table S2)<sup>20</sup>. Tissue lysates were analysed for PKC $\alpha$  (Cell Signaling #2056). GAPDH was the loading control. Immunoblots were quantified using ImageJ.

### **Statistical analysis**

Data with a normal distribution are presented as mean  $\pm$  standard error of the mean (SEM); data without a normal distribution are presented as median  $\pm$  interquartile range. Differences in survival were determined using a Gehan-Breslow-Wilcoxon test. Data were analyzed using a Student's t-test, or a Mann-Whitney test



if a normal distribution was not achieved. Data with two or more variables were analyzed using a Kruskal-Wallis test or 2-way ANOVA with Tukey post-hoc comparisons. A Spearman test or Bland-Altman analysis was performed to analyze correlation and agreement between data sets, respectively. All analysis was performed using GraphPad Prism software (California, USA);  $P < 0.05$  was considered statistically significant.

### **Disclosure**

None

### **Funding**

This work was supported by the British Heart Foundation [PG/16/23/32088; PG/18/12/33555; FS/18/62/34183;]. The Bioimaging Facility microscopes were purchased with grants from BBSRC, Wellcome Trust and University of Manchester Strategic Fund. We acknowledge the Engineering and Physical Science Research Council for funding the Henry Moseley X-ray Imaging Facility (University of Manchester) which has been made available through the Royce Institute for Advanced Materials [EP/F007906/1, EP/F001452/1, EP/I02249X, EP/M010619/1, EP/F028431/1, EP/M022498/1 and EP/R00661X/1].

### **Acknowledgements**

We thank the Biological Service Facility (University of Manchester, UK) for their support and care of all the animals used in this study; Maj Simonson-Jackson in the Genome Editing Unit (University of Manchester, UK) for help in generating the PKC $\alpha^{-/-}$  mice; Roger Meadows (University of Manchester, UK) for help with bioimaging.

## References

1. Gansevoort RT, Correa-Rotter R, Hemmelgarn BR, *et al.* Chronic kidney disease and cardiovascular risk: epidemiology, mechanisms, and prevention. *Lancet* 2013; **382**: 339-352.
2. London GM, Guérin AP, Marchais SJ, *et al.* Arterial media calcification in end-stage renal disease: impact on all-cause and cardiovascular mortality. *Nephrol Dial Transplant* 2003; **18**: 1731-1740.
3. Blacher J, Guerin AP, Pannier B, *et al.* Arterial calcifications, arterial stiffness, and cardiovascular risk in end-stage renal disease. *Hypertension* 2001; **38**: 938-942.
4. Paloian NJ, Giachelli CM. A current understanding of vascular calcification in CKD. *Am J Physiol Renal Physiol* 2014; **307**: F891-900.
5. Shroff RC, McNair R, Figg N, *et al.* Dialysis accelerates medial vascular calcification in part by triggering smooth muscle cell apoptosis. *Circulation* 2008; **118**: 1748-1757.
6. Lanzer P, Boehm M, Sorribas V, *et al.* Medial vascular calcification revisited: review and perspectives. *Eur Heart J* 2014; **35**: 1515-1525.
7. Lewis JR, Wong G, Taverniti A, *et al.* Association between Aortic Calcification, Cardiovascular Events, and Mortality in Kidney and Pancreas-Kidney Transplant Recipients. *Am J Nephrol* 2019: 1-10.
8. Shanahan CM, Crouthamel MH, Kapustin A, *et al.* Arterial calcification in chronic kidney disease: key roles for calcium and phosphate. *Circ Res* 2011; **109**: 697-711.
9. Kapustin AN, Shanahan CM. Calcium regulation of vascular smooth muscle cell-derived matrix vesicles. *Trends Cardiovasc Med* 2012; **22**: 133-137.
10. Demer LL, Tintut Y. Inflammatory, metabolic, and genetic mechanisms of vascular calcification. *Arterioscler Thromb Vasc Biol* 2014; **34**: 715-723.
11. Shioi A, Nishizawa Y, Jono S, *et al.* Beta-glycerophosphate accelerates calcification in cultured bovine vascular smooth muscle cells. *Arterioscler Thromb Vasc Biol* 1995; **15**: 2003-2009.
12. Steitz SA, Speer MY, Curinga G, *et al.* Smooth muscle cell phenotypic transition associated with calcification: upregulation of Cbfa1 and downregulation of smooth muscle lineage markers. *Circ Res* 2001; **89**: 1147-1154.
13. Son BK, Kozaki K, Iijima K, *et al.* Statins protect human aortic smooth muscle cells from inorganic phosphate-induced calcification by restoring Gas6-Axl survival pathway. *Circ Res* 2006; **98**: 1024-1031.
14. Collett GD, Sage AP, Kirton JP, *et al.* Axl/phosphatidylinositol 3-kinase signaling inhibits mineral deposition by vascular smooth muscle cells. *Circ Res* 2007; **100**: 502-509.
15. Son BK, Kozaki K, Iijima K, *et al.* Gas6/Axl-PI3K/Akt pathway plays a central role in the effect of statins on inorganic phosphate-induced calcification of vascular smooth muscle cells. *Eur J Pharmacol* 2007; **556**: 1-8.
16. Alam MU, Kirton JP, Wilkinson FL, *et al.* Calcification is associated with loss of functional calcium-sensing receptor in vascular smooth muscle cells. *Cardiovasc Res* 2009; **81**: 260-268.
17. Speer MY, Yang HY, Brabb T, *et al.* Smooth muscle cells give rise to osteochondrogenic precursors and chondrocytes in calcifying arteries. *Circ Res* 2009; **104**: 733-741.
18. Naik V, Leaf EM, Hu JH, *et al.* Sources of cells that contribute to atherosclerotic intimal calcification: an in vivo genetic fate mapping study. *Cardiovasc Res* 2012; **94**: 545-554.

19. Ibels LS, Alfrey AC, Huffer WE, *et al.* Arterial calcification and pathology in uremic patients undergoing dialysis. *Am J Med* 1979; **66**: 790-796.
20. Borland SJ, Morris TG, Borland SC, *et al.* Regulation of vascular smooth muscle cell calcification by syndecan-4/FGF-2/PKC $\alpha$  signalling and cross-talk with TGF $\beta$ . *Cardiovasc Res* 2017; **113**: 1639-1652.
21. Watson KE, Boström K, Ravindranath R, *et al.* TGF-beta 1 and 25-hydroxycholesterol stimulate osteoblast-like vascular cells to calcify. *J Clin Invest* 1994; **93**: 2106-2113.
22. Singh RK, Kumar S, Gautam PK, *et al.* Protein kinase C- $\alpha$  and the regulation of diverse cell responses. *Biomol Concepts* 2017; **8**: 143-153.
23. Menne J, Park JK, Boehne M, *et al.* Diminished loss of proteoglycans and lack of albuminuria in protein kinase C-alpha-deficient diabetic mice. *Diabetes* 2004; **53**: 2101-2109.
24. Hyde GD, Taylor RF, Ashton N, *et al.* Axl tyrosine kinase protects against tubulo-interstitial apoptosis and progression of renal failure in a murine model of chronic kidney disease and hyperphosphataemia. *PLoS One* 2014; **9**: e102096.
25. El-Abbadi MM, Pai AS, Leaf EM, *et al.* Phosphate feeding induces arterial medial calcification in uremic mice: role of serum phosphorus, fibroblast growth factor-23, and osteopontin. *Kidney Int* 2009; **75**: 1297-1307.
26. Pai A, Leaf EM, El-Abbadi M, *et al.* Elastin degradation and vascular smooth muscle cell phenotype change precede cell loss and arterial medial calcification in a uremic mouse model of chronic kidney disease. *Am J Pathol* 2011; **178**: 764-773.
27. Lau WL, Leaf EM, Hu MC, *et al.* Vitamin D receptor agonists increase klotho and osteopontin while decreasing aortic calcification in mice with chronic kidney disease fed a high phosphate diet. *Kidney Int* 2012; **82**: 1261-1270.
28. Huesa C, Millán JL, van 't Hof RJ, *et al.* A new method for the quantification of aortic calcification by three-dimensional micro-computed tomography. *Int J Mol Med* 2013; **32**: 1047-1050.
29. López-Guimet J, Peña-Pérez L, Bradley RS, *et al.* MicroCT imaging reveals differential 3D micro-scale remodelling of the murine aorta in ageing and Marfan syndrome. *Theranostics* 2018; **8**: 6038-6052.
30. Walton LA, Bradley RS, Withers PJ, *et al.* Morphological Characterisation of Unstained and Intact Tissue Micro-architecture by X-ray Computed Micro- and Nano-Tomography. *Sci Rep* 2015; **5**: 10074.
31. Lin ME, Chen TM, Wallingford MC, *et al.* Runx2 deletion in smooth muscle cells inhibits vascular osteochondrogenesis and calcification but not atherosclerotic lesion formation. *Cardiovasc Res* 2016; **112**: 606-616.
32. Lin ME, Chen T, Leaf EM, *et al.* Runx2 Expression in Smooth Muscle Cells Is Required for Arterial Medial Calcification in Mice. *Am J Pathol* 2015; **185**: 1958-1969.
33. Lee K, Kim H, Jeong D. Protein kinase C regulates vascular calcification via cytoskeleton reorganization and osteogenic signaling. *Biochem Biophys Res Commun* 2014; **453**: 793-797.
34. Tossidou I, Starker G, Kruger J, *et al.* PKC-alpha modulates TGF-beta signaling and impairs podocyte survival. *Cell Physiol Biochem* 2009; **24**: 627-634.
35. Yao L, Sun YT, Sun W, *et al.* High phosphorus level leads to aortic calcification via  $\beta$ -catenin in chronic kidney disease. *Am J Nephrol* 2015; **41**: 28-36.

36. Galea GL, Meakin LB, Williams CM, *et al.* Protein kinase C $\alpha$  (PKC $\alpha$ ) regulates bone architecture and osteoblast activity. *J Biol Chem* 2014; **289**: 25509-25522.
37. Wei J, Fang F, Lam AP, *et al.* Wnt/ $\beta$ -catenin signaling is hyperactivated in systemic sclerosis and induces Smad-dependent fibrotic responses in mesenchymal cells. *Arthritis Rheum* 2012; **64**: 2734-2745.
38. Działo E, Tkacz K, Błyszczuk P. Crosstalk between the TGF- $\beta$  and WNT signalling pathways during cardiac fibrogenesis. *Acta Biochim Pol* 2018; **65**: 341-349.
39. Lee KS, Kim HJ, Li QL, *et al.* Runx2 is a common target of transforming growth factor beta1 and bone morphogenetic protein 2, and cooperation between Runx2 and Smad5 induces osteoblast-specific gene expression in the pluripotent mesenchymal precursor cell line C2C12. *Mol Cell Biol* 2000; **20**: 8783-8792.
40. Lee KS, Hong SH, Bae SC. Both the Smad and p38 MAPK pathways play a crucial role in Runx2 expression following induction by transforming growth factor-beta and bone morphogenetic protein. *Oncogene* 2002; **21**: 7156-7163.
41. Chen NX, Moe SM. Pathophysiology of Vascular Calcification. *Curr Osteoporos Rep* 2015; **13**: 372-380.
42. Bartoli-Leonard F, Wilkinson FL, Langford-Smith AWW, *et al.* The Interplay of SIRT1 and Wnt Signaling in Vascular Calcification. *Front Cardiovasc Med* 2018; **5**: 183.
43. Crouthamel MH, Lau WL, Leaf EM, *et al.* Sodium-dependent phosphate cotransporters and phosphate-induced calcification of vascular smooth muscle cells: redundant roles for PiT-1 and PiT-2. *Arterioscler Thromb Vasc Biol* 2013; **33**: 2625-2632.
44. Yamada S, Leaf EM, Chia JJ, *et al.* PiT-2, a type III sodium-dependent phosphate transporter, protects against vascular calcification in mice with chronic kidney disease fed a high-phosphate diet. *Kidney Int* 2018; **94**: 716-727.
45. Paloian NJ, Leaf EM, Giachelli CM. Osteopontin protects against high phosphate-induced nephrocalcinosis and vascular calcification. *Kidney Int* 2016; **89**: 1027-1036.
46. Krzanowski M, Krzanowska K, Dumnicka P, *et al.* Elevated Circulating Osteoprotegerin Levels in the Plasma of Hemodialyzed Patients With Severe Artery Calcification. *Ther Apher Dial* 2018; **22**: 519-529.
47. Stubbe J, Skov V, Thiesson HC, *et al.* Identification of differential gene expression patterns in human arteries from patients with chronic kidney disease. *Am J Physiol Renal Physiol* 2018; **314**: F1117-F1128.
48. Janda K, Krzanowski M, Gajda M, *et al.* Cardiovascular risk in chronic kidney disease patients: intima-media thickness predicts the incidence and severity of histologically assessed medial calcification in radial arteries. *BMC Nephrol* 2015; **16**: 78.
49. Nakagawa S, Nishihara K, Miyata H, *et al.* Molecular Markers of Tubulointerstitial Fibrosis and Tubular Cell Damage in Patients with Chronic Kidney Disease. *PLoS One* 2015; **10**: e0136994.
50. Hodgins JB, Nair V, Zhang H, *et al.* Identification of cross-species shared transcriptional networks of diabetic nephropathy in human and mouse glomeruli. *Diabetes* 2013; **62**: 299-308.
